# Supplementary material
Source: PubMed Central journal article supplement (PMC3276666)
Supplement: mmc1.pdf [file mmc1.pdf]

## Supplemental Data

### Mitochondrial DNA and Y Chromosome Variation

### Provides Evidence for a Recent Common Ancestry

### between Native Americans and Indigenous Altaians

Matthew C. Dulik, Sergey I. Zhadanov, Ludmila P. Osipova, Ayken Askapuli, Lydia Gau, Omer Gokcumen, Samara Rubinstein, and Theodore G. Schurr

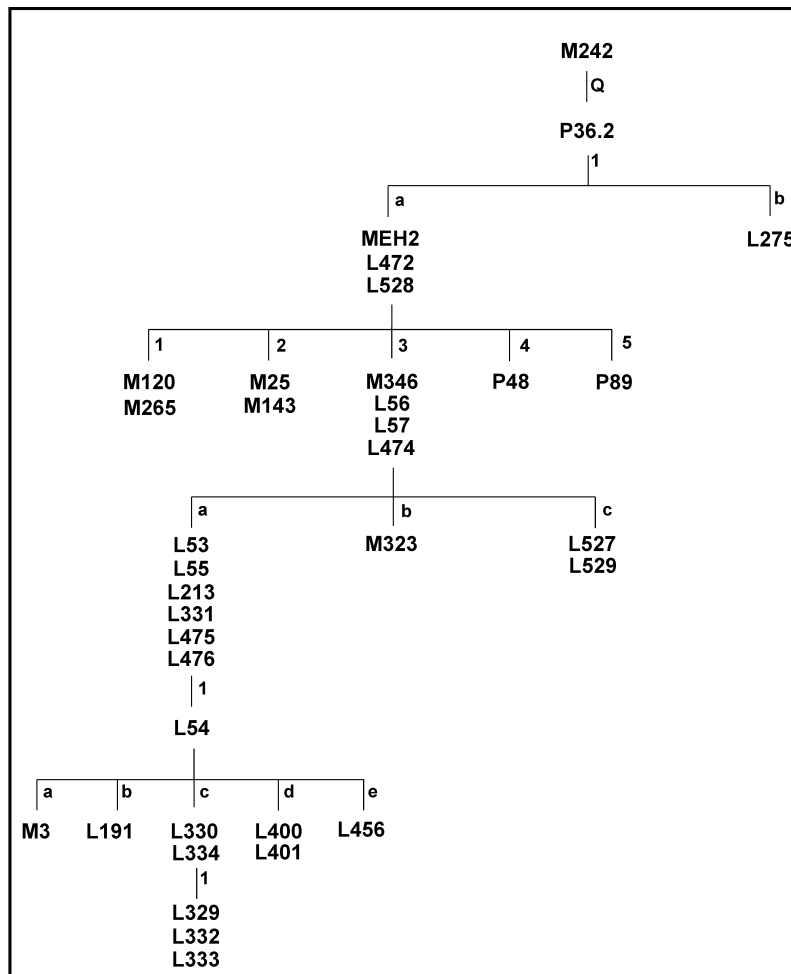

Figure S1: NRY haplogroup Q phylogeny

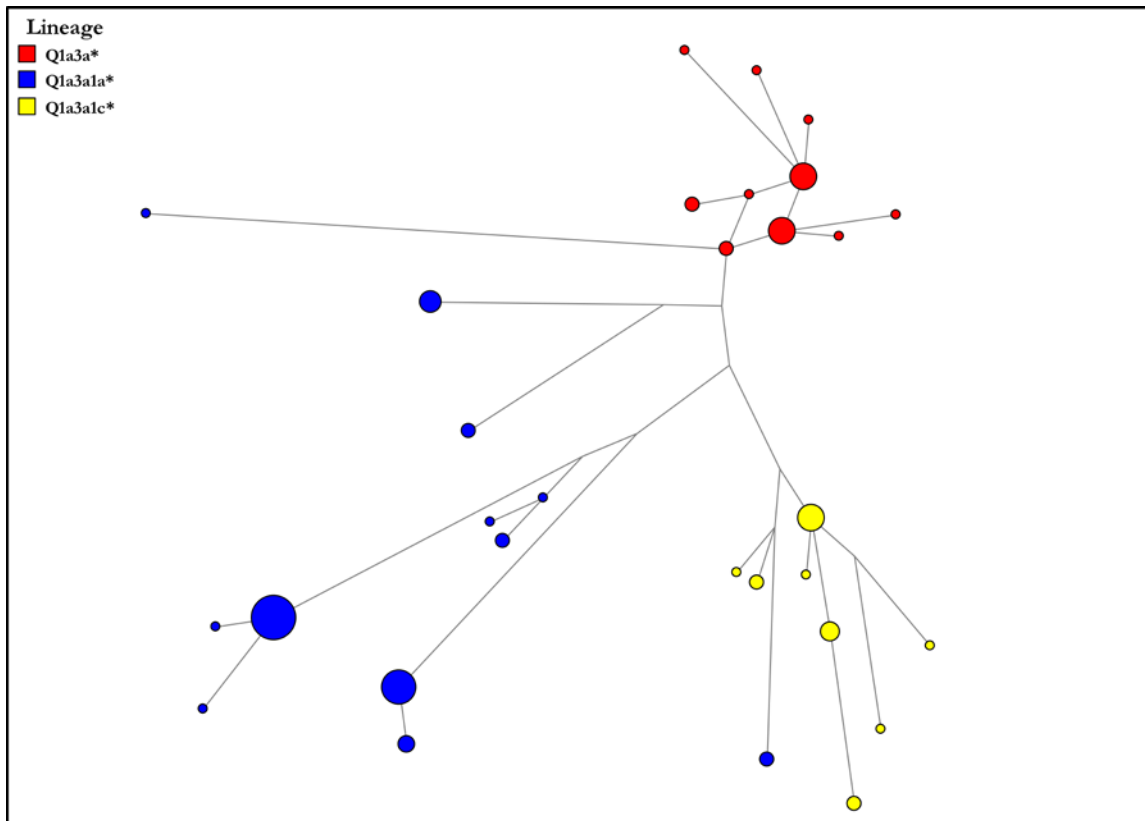

Figure S2: Reduced median-median joining network of 15 loci Y-STR haplotypes for haplogroup Q in Altaians and Native Americans

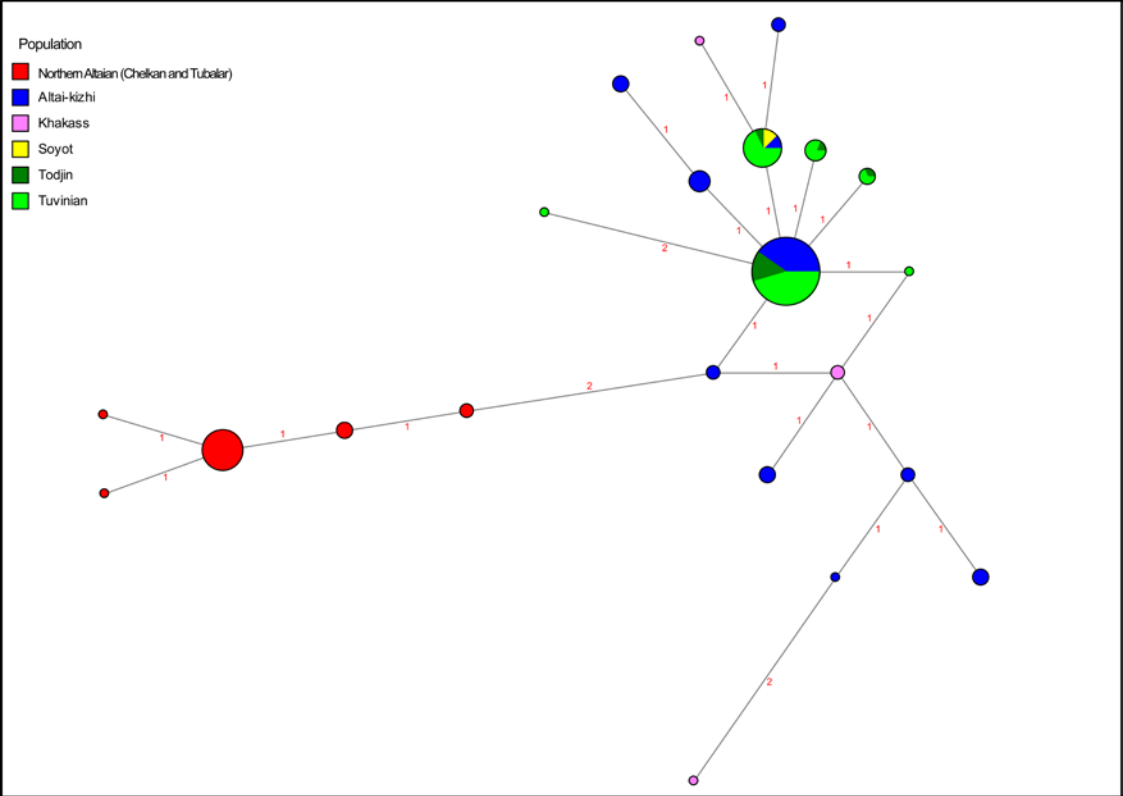

Figure S3: Reduced median-median joining network of 10 loci Y-STR haplotypes for haplogroup Q in southern Siberians

**Table S1: PCR-RFLP and deletion tests for mtDNA SNPs**

| Hg   | SNP/Indel     | RFLP Test     | Primers (5'-3')                        | Size    | T <sub>m</sub> (C°) | Reference            |
|------|---------------|---------------|----------------------------------------|---------|---------------------|----------------------|
| A    | 663           | +HaeIII 663   | 534-553 / 725-706                      | 191     | 51                  | [1]                  |
| B    | 9-bp deletion | N/A           | 8188-8207 / 8366-8345                  | 178/169 | 49                  | Modified from [1]    |
| C    | 13263         | -HincII 13259 | 13001-13020 / 13403-13384              | 402     | 45                  | Modified from [1]    |
| C    | 13263         | +AhlI 13262   | 13001-13020 / 13403-13384              | 402     | 45                  | Modified from [1]    |
| C4   | 15204         | -BclI 15204   | 15161-15180 / 15676-15658              | 515     | 53                  | This study           |
| D    | 5178A         | -AhlI 5176    | 5151-5170 / 5481-5464                  | 330     | 55                  | [1]                  |
| D5   | 10397         | +BsrI 10396   | 10279-10296 / 10569-10550              | 290     | 51                  | This study           |
| E    | 7598          | -HhaI 7598    | 7367-7384 / 7628-7610                  | 261     | 51                  | Modified from [2]    |
| F1   | 12406         | -HpaI 12406   | 12385-12405 / 12576-12595              | 191     | 55                  | Modified from [2, 3] |
| F1   | 12406         | -HincII 12406 | 12385-12405 / 12576-12595              | 191     | 55                  | Modified from [2, 3] |
| F2   | 7828          | +HhaI 7828    | 6890-6909 / 7131-7115                  | 241     | 47                  | This study           |
| G    | 4883          | +HaeII 4830   | 4651-4670 / 4952-4934                  | 301     | 46                  | Modified from [2]    |
| H    | 7028          | -AhlI 7025    | 6890-6909 / 7131-7115                  | 241     | 47                  | [4]                  |
| H2   | 4769          | +AhlI 4769    | 4651-4670 / 4952-4934                  | 303     | 49                  | This study           |
| H8   | 13101         | +HpaII 13101  | 13001-13020 / 13403-13384              | 402     | 45                  | This study           |
| HV   | 14766         | -MseII 14766  | 14407-14424 / 14810-14791              | 403     | 51                  | Modified from [5]    |
| V    | 4577          | -NlaI 4577    | 4500-4519 / 4678-4659                  | 178     | 51                  | Modified from [4]    |
| I, X | 1719          | -DdeI 1715    | 1615-1643 / 1899-1879                  | 284     | 54                  | Modified from [4]    |
| J    | 13708         | -BsrOI 13704  | 13537-13556 / 13851-13832              | 314     | 51                  | Modified from [4]    |
| K    | 9055          | -HaeII 9052   | 8925-8953 / 9100-9081                  | 175     | 53                  | Modified from [4]    |
| M/   | 10398         | +DdeI 10394   | 10279-10296 / 10569-10550              | 290     | 51                  | Modified from [1]    |
| M    | 10400         | +AhlI 10398   | 10279-10296 / 10569-10550              | 290     | 51                  | Modified from [1]    |
| N9   | 5417          | +Tsp509I 5417 | 5151-5170 / 5481-5464                  | 330     | 55                  | This study           |
| R    | 12705         | +MboII 12705  | 12599-12618 / 12785-12766              | 186     | 51                  | This study           |
| R2   | 14305         | -AhlI 14304   | 13940-13959 / 14385-14366              | 445     | 57                  | This study           |
| R6   | 12285         | -AhlI 12285   | 12104-12124 / 12338-12309              | 234     | 59                  | This study           |
| T    | 15607         | +AhlI 15606   | 15409-15428 / 15728-15709              | 319     | 51                  | Modified from [4]    |
| U    | 12308         | +HinfI 12308  | 12104-12124 / 12338-12309 <sup>a</sup> | 234     | 59                  | [4]                  |
| U1   | 13104         | +MboI 13104   | 13001-13020 / 13403-13384              | 402     | 45                  | This study           |
| U4   | 4646          | +RsaI 4646    | 4500-4519 / 4678-4659                  | 178     | 53                  | This study           |
| U5   | 13617         | -MboII 13617  | 13537-13556 / 13851-13832              | 314     | 51                  | This study           |
| W    | 8994          | -HaeIII 8994  | 8925-8953 / 9100-9081                  | 175     | 53                  | Modified from [4]    |
| X    | 14470         | +AclI 14465   | 14407-14424 / 14810-14791              | 403     | 51                  | Modified from [5]    |
| X2c  | 15310         | +BsrDI 15310  | 15161-15180 / 15676-15658              | 515     | 53                  | This study           |
| Y    | 7933          | +MboI 7933    | 7871-7890 / 8020-8001                  | 149     | 51                  | This study           |

References: [1] Torroni et al. 1993; [2] Torroni et al. 1994; [3] Ballinger et al. 1992; [4] Torroni et al. 1996; [5] Macaulay et al. 1999.

<sup>a</sup>12338-12309 is a mismatch primer.

**Table S2. NRY marker PCR and sequencing primers and conditions**

| Hg     | Marker    | SNP         | Primers (5'-3')             | Size        | T <sub>m</sub> (C°) | Reference         |
|--------|-----------|-------------|-----------------------------|-------------|---------------------|-------------------|
| C3b    | P39       | G95A        | AAAATTTGCCAAGCATGGTG        | 184         | 59                  | Designed from [6] |
|        |           |             | CAAGGGGCAGATTGATTGAT        |             |                     |                   |
| N1b    | P43       | G268A       | TTTGGAGGGACATTATTCIC        | 519         | 53                  | [5]               |
|        |           |             | GAAGCAATACTCTGAAAAAGT       |             |                     |                   |
| N1c    | TAT-C M46 | A69G        | GACTCTGAGTGTAGACTTGTGA      | 112         | 60                  | [3]               |
|        |           |             | GAAGGTGCCGTAAAAAGTGTGAA     |             |                     |                   |
| C3d    | M407      | A149G       | GTTATACCCCTGCTCTAAAAGTGCCTC | 418         | 57                  | [4]               |
|        |           |             | GTAGAGATGGGGCTTCACCGTGTAC   |             |                     |                   |
| Q1a3   | M346      | C33G        | CCCCGTTTTTTCCTCTCTGCC       | 419         | 58                  | [4]               |
|        |           |             | AATCTGCCTTCCAAACAACC        |             |                     |                   |
| R1a1   | M17       | 68G del     | CTGGTCATAACACTGGAAAATC      | 333/<br>334 | 51                  | [2]               |
|        |           |             | TGAACCTACAATGTGAAACT        |             |                     |                   |
| Q1a    | MEH2      | G880T       | ATTTCATAATATTGATTCAGAACAG   | 938         | 52                  | [1]               |
|        |           |             | TACCATGAAAAATTCATAATCCACA   |             |                     |                   |
| C3e    | P53.1     | T112C       | GATGTCACCTTCCGTCTA          | 476         | 51                  | [1]               |
|        |           |             | ACATGGTCATCTGTAGCTCC        |             |                     |                   |
| C3f    | P62       | 443C insert | AACCCCTGCCACAAATACAT        | 623/<br>624 | 58                  | [1]               |
|        |           |             | TCTGGAACCCCTGGAGAGATC       |             |                     |                   |
| N1c    | P105      | G580A       | TTATTCCACCCAGCACTGTTA       | 1090        | 56                  | [1]               |
|        |           |             | AGGCACAAATGGTAAGGTCTT       |             |                     |                   |
| R1b    | M343      | C402A       | TTTAACTCCTCCAGCTCTGCA       | 424         | 59                  | [1]               |
|        |           |             | ACCCCCACATATCTCCAGG         |             |                     |                   |
| Q1a4   | P48       | 428T insert | TGAAGGACAGTAAGTACACA        | 637/<br>638 | 47                  | [1]               |
|        |           |             | TAAGTCCATTGATCTACAGA        |             |                     |                   |
| Q1a5   | P89       | G258T       | ACATTACAGGACCTTGAT          | 857         | 47                  | [1]               |
|        |           |             | TGCCTAACAAATACTCCC          |             |                     |                   |
| R1a1d  | P98       | C504T       | TGGAGGGTAAGTGAGTAG          | 954         | 47                  | [1]               |
| D3     | P99       | C533T       | TTTTAATGGAACACCGTAG         |             |                     |                   |
| O3a3c2 | P101      | G360A       | TGAGGTTGATGTTTACTAAGATC     | 506         | 51                  | [1]               |
|        |           |             | CCTGCTAAATCAGTTCCACAC       |             |                     |                   |
| R1a1e  | PK5       | C186T       | TTCCAAAACACATGCTTCTGC       | 393         | 57                  | [1]               |
|        |           |             | TAAAAAGGAGGAGGGACTGC        |             |                     |                   |

Table 3.5 References: [1] Karafet et al. 2008; [2] Underhill et al. 1997; [3] Zerjal et al. 1997; [4] Sengupta et al. 2006; [5] Karafet et al. 2002; [6] Zegura et al. 2004

**Table S3. Altaian mtDNA haplotypes**

| Hg    | SNPs                   | HVS1 (16024-16400)<br>16,000+ | Chelkan | Kumandin | Tubalar | Altai-kizhi |
|-------|------------------------|-------------------------------|---------|----------|---------|-------------|
| A4    | 663; 10873             | 223-290-319-362               |         |          |         | 4           |
| A4    | 663; 10873             | 192-223-290-319-362           |         | 1        |         | 1           |
| A4a1  | 663; 10873             | 223-249-290-319-362           |         |          |         | 3           |
| B4b1  | 9-bp del; 10873; 12705 | 086-136-189-217               | 3       | 2        | 2       | 4           |
| C1a   | 10398; 10400; 13263    | 223-298-325-327-356           |         |          |         | 2           |
| C4    | 10398; 10400; 13263    | 223-298-327                   | 1       | 8        | 10      | 5           |
| C4    | 10398; 10400; 13263    | 223-242-298-327               |         |          |         | 1           |
| C4    | 10398; 10400; 13263    | 093-223-298-327               |         |          |         | 1           |
| C4    | 10398; 10400; 13263    | 223-298-311-327               |         | 1        | 3       |             |
| C4    | 10398; 10400; 13263    | 223-298-327-329               |         |          |         | 1           |
| C4    | 10398; 10400; 13263    | 223-298-327-329h(A/G)         |         |          |         | 1           |
| C4a1  | 10398; 10400; 13263    | 129-150-223-298-327           |         |          |         | 1           |
| C4a1b | 10398; 10400; 13263    | 129-223-298-327               |         |          |         | 2           |
| C4a1c | 10398; 10400; 13263    | 093-129-223-298-327           | 3       |          |         | 19          |
| C4a1c | 10398; 10400; 13263    | 093-129-223-298-311-327       |         |          |         | 2           |
| C4a1c | 10398; 10400; 13263    | 093-129-223-298-312-327       |         |          |         | 1           |
| C4a2  | 10398; 10400; 13263    | 171-223-298-327-344-357       |         |          |         | 6           |
| C4a2  | 10398; 10400; 13263    | 171-223-278-298-327-344-357   |         |          |         | 4           |
| C4a2  | 10398; 10400; 13263    | 171-223-278-298-344-357       |         |          |         | 2           |
| C4a2  | 10398; 10400; 13263    | 171-223-278-298-344h(T/C)-357 |         |          |         | 1           |
| C4a2  | 10398; 10400; 13263    | 171-223-298-327-344           | 3       |          | 1       |             |
| C4b3  | 10398; 10400; 13263    | 223-291-298-327               |         |          | 5       | 22          |
| C5    | 10398; 10400; 13263    | 223-288-291-298-327           |         |          | 1       |             |
| C5    | 10398; 10400; 13263    | 148-223-288-298-327           |         |          |         | 3           |
| C5a   | 10398; 10400; 13263    | 223-261-288-298               |         |          |         | 5           |

|       |                            |                                     |    |    |   |    |
|-------|----------------------------|-------------------------------------|----|----|---|----|
| C5b   | 10398; 10400; 13263        | 093-223-288-291-298-327             | 7  | 11 | 3 | 2  |
| C5b   | 10398; 10400; 13263        | 093-223-288-291-298-311-327         |    | 1  |   |    |
| C5b   | 10398; 10400; 13263        | 093-223-288-291-298-327-362         |    |    | 1 |    |
| C5c   | 10398; 10400; 13263        | 093-223-288-298-327-390             |    |    |   | 6  |
| D     | 5178A; 10398; 10400        | 223-362                             | 3  |    | 3 | 8  |
| D     | 5178A; 10398; 10400        | 218-223-362                         |    |    |   | 1  |
| D     | 5178A; 10398; 10400        | 140-223-274-311-362                 |    |    |   | 8  |
| D     | 5178A; 10398; 10400        | 082-147A-223-362                    | 3  |    | 2 | 1  |
| D4    | 5178A; 10398; 10400        | 223-319-362                         |    |    |   | 5  |
| D4b1  | 5178A; 10398; 10400        | 093-172-173-215-223-319-362         |    | 3  | 6 | 3  |
| D4j   | 5178A; 10398; 10400        | 223-291-362                         |    |    |   | 3  |
| D4m   | 5178A; 10398; 10400        | 042-214-223-362                     | 4  | 5  | 4 | 3  |
| D4o   | 5178A; 10398; 10400        | 223-290-362                         |    |    |   | 3  |
| D4o1  | 5178A; 10398; 10400        | 176-183-223-274-290-319-342-362     | 3  |    | 2 |    |
| D4o1  | 5178A; 10398; 10400        | 129-176-183-223-274-290-319-342-362 |    |    | 1 |    |
| D5a2a | 5178A; 10397; 10398; 10400 | 092-126-164-189-223-266-362         |    |    | 3 | 2  |
| D5c2  | 5178A; 10397; 10398; 10400 | 129-188.1C-193.1C-362-390           | 8  | 2  |   |    |
| F1a1  | 10873; 12406; 12705        | 162-172-304                         | 3  | 1  |   |    |
| F1b   | 10873; 12406; 12705        | 189-232A-249-304-311                | 7  | 1  |   | 4  |
| F1b   | 10873; 12406; 12705        | 189-232A-249-294-304-311            |    |    |   | 2  |
| F1b   | 10873; 12406; 12705        | 189-270-304                         |    |    |   | 1  |
| F1d'e | 10873; 12406; 12705        | 189-304                             |    |    |   | 16 |
| F2    | 7828; 10873; 12705         | 092A-291-304                        | 14 |    | 2 | 7  |
| G1a1  | 4833; 10398; 10400         | 223-325-362                         |    |    |   | 9  |
| G2a   | 4833; 10398; 10400         | 223-227-278-362                     | 2  |    |   |    |
| G2a   | 4833; 10398; 10400         | 223-227 h(G/A)-278-362              | 1  |    |   |    |
| G2a   | 4833; 10398; 10400         | 223-278-304-362                     |    |    |   | 1  |
| G2a   | 4833; 10398; 10400         | 223-278-287-304-362                 |    |    |   | 2  |
| H     | 7028; 10873; 12705; 14766  | CRS                                 |    |    | 1 |    |
| H     | 7028; 10873; 12705; 14766  | 311                                 |    |    |   | 2  |
| H     | 7028; 10873; 12705; 14766  | 092-245-362                         |    |    |   | 1  |
| H     | 7028; 10873; 12705; 14766  | 092h(A/C)-245-362                   |    |    |   | 1  |

|       |                                  |                              |    |   |   |   |
|-------|----------------------------------|------------------------------|----|---|---|---|
| H     | 7028; 10873; 12705; 14766        | 169-184                      |    |   |   | 1 |
| H     | 7028; 10873; 12705; 14766        | 261-311                      |    |   |   | 1 |
| H1b   | 7028; 10873; 12705; 14766        | 189-356                      |    |   | 1 |   |
| H1b   | 7028; 10873; 12705; 14766        | 080-189-356                  | 1  |   |   | 1 |
| H2a1  | 4769; 7028; 10873; 12705; 14766  | 354                          |    |   |   | 8 |
| H2a1  | 4769; 7028; 10873; 12705; 14766  | 311-354                      |    |   |   | 1 |
| H8    | 7028; 10873; 12705; 13101; 14766 | 288-362                      |    | 3 | 2 | 4 |
| I     | 1719; 8251; 10398; 10873         | 129-223-391                  |    |   |   | 4 |
| J     | 10398; 10873; 12705; 13708       | 069-126-241                  |    |   |   | 3 |
| J     | 10398; 10873; 12705; 13708       | 069-126-241-301              |    |   |   | 1 |
| J     | 10398; 10873; 12705; 13708       | 069-126-189-260              |    |   |   | 1 |
| J     | 10398; 10873; 12705; 13708       | 069-126-145-261-290          |    |   |   | 4 |
| J1b   | 10398; 10873; 12705; 13708       | 069-126-145-172-222-261      |    |   |   | 1 |
| J1b   | 10398; 10873; 12705; 13708       | 069-126-145-172-222-261-304G |    |   |   | 1 |
| K1a1a | 9055; 10398; 10873; 12308; 12705 | 093-224-311                  |    |   |   | 7 |
| K1a1a | 9055; 10398; 10873; 12308; 12705 | 093-189-224-311              |    |   |   | 2 |
| M8a   | 10398; 10400; 14470              | 184-223-298-319              |    |   |   | 6 |
| M8a   | 10398; 10400; 14470              | 184 h(T/C)-223-298-319       |    |   |   | 1 |
| M8a   | 10398; 10400; 14470              | 134-184-223-298-319          |    |   |   | 2 |
| M8a1  | 10398; 10400; 14470              | 172-184-189-223-298-319      |    |   |   | 1 |
| M9a1a | 10398; 10400                     | 223-234-316-362              |    |   |   | 3 |
| M9a1a | 10398; 10400                     | 223-234-316-344-362          |    |   |   | 1 |
| M10   | 10398; 10400                     | 129-186-223-311-362          | 1  |   |   |   |
| M10a1 | 10398; 10400                     | 093-193-223-311-357-381      |    |   |   | 1 |
| N1b   | 10873                            | 145-176G-223-258-291-390     |    |   |   | 1 |
| N9a   | 5417; 10873                      | 223-248-257A-261-311         | 16 | 1 | 2 |   |
| R9b1  | 10873; 12705                     | 093-207-304-362-399          |    |   |   | 6 |
| R9b1  | 10873; 12705                     | 145-192-243-304-309-390      | 1  | 2 |   |   |
| T1a   | 10873; 12705; 15607              | 126-163-186-189-294          |    | 1 |   |   |
| T2b   | 10873; 12705; 15607              | 111-126-294-296-304-311-327  |    |   |   | 1 |
| U2e   | 10398; 10873; 12308; 12705       | 051-129C-189-214-258-362     |    |   |   | 2 |
| U4    | 4646; 10398; 10873; 12308; 12705 | 356                          | 1  |   | 6 |   |



|       |                                   |                                 |    |    |    |     |
|-------|-----------------------------------|---------------------------------|----|----|----|-----|
| U4    | 4646; 10398; 10873; 12308; 12705  | 129-356                         |    |    | 1  |     |
| U4b1b | 4646; 10398; 10873; 12308; 12705  | 311-356                         | 3  | 2  | 4  | 2   |
| U5a1  | 10398; 10873; 12308; 12705; 13617 | 192-241-256-270-287-304-325-399 | 2  | 5  | 2  | 3   |
| U5a1  | 10398; 10873; 12308; 12705; 13617 | 192-256-270-319-320-399         |    |    | 1  |     |
| U5b2  | 10398; 10873; 12308; 12705; 13617 | 192-249-311                     |    |    |    | 5   |
| U5b2  | 10398; 10873; 12308; 12705; 13617 | 093-192-249-311                 |    |    |    | 1   |
| W6    | 1719; 8994; 10873                 | 192-223-292-325                 | 1  |    |    |     |
| X2e   | 10873; 14470; 15310               | 189-223-278                     |    | 2  |    | 6   |
| Z     | 10398; 10400                      | 185-223-260-298                 |    |    |    | 8   |
| Z1a   | 10398; 10400                      | 129-185-223-224-260-298         |    |    | 2  | 4   |
|       |                                   |                                 | 91 | 52 | 71 | 276 |

**Table S4. Altaian Y-chromosome STR haplotypes**

| Haplotype # | Haplogroup | DYS19 | DYS385 | DYS389I | DYS389b | DYS390 | DYS391 | DYS392 | DYS393 | DYS437 | DYS438 | DYS439 | DYS448 | DYS456 | DYS458 | DYS635 | Y GATA H4 | Chelkan | Kumandin | Tubalar | Altai-kizhi |
|-------------|------------|-------|--------|---------|---------|--------|--------|--------|--------|--------|--------|--------|--------|--------|--------|--------|-----------|---------|----------|---------|-------------|
| 1           | C3*        | 15    | 12-15  | 13      | 16      | 24     | 9      | 11     | 13     | 14     | 11     | 11     | null   | 16     | 16     | 21     | 11        |         |          |         | 2           |
| 2           | C3*        | 15    | 12-13  | 13      | 16      | 25     | 10     | 11     | 13     | 14     | 10     | 10     | 22     | 15     | 18     | 21     | 11        |         |          |         | 3           |
| 3           | C3*        | 16    | 12-15  | 13      | 16      | 24     | 9      | 11     | 13     | 14     | 11     | 11     | null   | 16     | 16     | 21     | 11        |         |          |         | 6           |
| 4           | C3*        | 15    | 12-15  | 13      | 16      | 24     | 9      | 11     | 13     | 14     | 12     | 11     | null   | 16     | 16     | 21     | 11        |         |          |         | 1           |
| 5           | C3*        | 16    | 12-15  | 11      | 16      | 24     | 9      | 11     | 13     | 14     | 11     | 11     | null   | 16     | 16     | 21     | 11        |         |          |         | 1           |
| 6           | C3*        | 15    | 13-13  | 13      | 16      | 25     | 10     | 11     | 13     | 14     | 10     | 10     | 22     | 15     | 18     | 21     | 11        |         |          |         | 1           |
| 7           | C3*        | 16    | 12-15  | 13      | 16      | 24     | 9      | 11     | 13     | 14     | 11     | 11     | null   | 16     | 16     | 21     | 11        |         |          |         | 1           |
| 8           | C3*        | 16    | 12-16  | 13      | 16      | 24     | 9      | 11     | 13     | 14     | 11     | 11     | null   | 16     | 16     | 21     | 11        |         |          |         | 1           |
| 9           | C3*        | 16    | 12-15  | 13      | 16      | 24     | 9      | 11     | 13     | 14     | 11     | 11     | null   | 15     | 16     | 21     | 11        |         |          |         | 1           |
| 10          | C3*        | 15    | 12-15  | 13      | 16      | 24     | 9      | 11     | 13     | 14     | 11     | 11     | null   | 16     | 16     | 21     | 11        |         |          |         | 1           |
| 11          | C3*        | 16    | 12-15  | 13      | 16      | 24     | 9      | 11     | 13     | 14     | 11     | 11     | null   | 16     | 16     | 20     | 11        |         |          |         | 1           |
| 12          | C3c        | 16    | 12-12  | 14      | 17      | 23     | 9      | 11     | 13     | 14     | 10     | 11     | 20     | 15     | 19     | 23     | 10        |         |          |         | 1           |
| 13          | C3c        | 15-17 | 12-12  | 14      | 17      | 24     | 9      | 11     | 13     | 14     | 10     | 11     | 20     | 15     | 18     | 22     | 10        |         |          |         | 1           |
| 14          | C3c        | 15-17 | 12-12  | 14      | 17      | 24     | 9      | 11     | 13     | 14     | 10     | 11     | 20     | 15     | 18     | 23     | 10        |         |          |         | 1           |
| 15          | C3c        | 15-16 | 12-12  | 14      | 17      | 23     | 9      | 11     | 13     | 14     | 10     | 11     | 20     | 15     | 18     | 23     | 10        |         |          |         | 1           |
| 16          | C3c        | 15-17 | 12-12  | 14      | 17      | 24     | 9      | 11     | 13     | 15     | 10     | 11     | 20     | 15     | 18     | 23     | 10        |         |          |         | 1           |
| 17          | D3a        | 15    | 11-11  | 14      | 16      | 25     | 11     | 7      | 13     | 14     | 11     | 13     | 18     | 15     | 17     | 21     | 11        |         |          |         | 1           |
| 18          | D3a        | 15    | 11-11  | 14      | 16      | 26     | 11     | 7      | 13     | 14     | 11     | 12     | 19     | 15     | 17     | 21     | 11        |         |          |         | 2           |
| 19          | D3a        | 15    | 11-11  | 14      | 16      | 25     | 11     | 7      | 13     | 14     | 11     | 11     | 19     | 15     | 17     | 21     | 11        |         |          |         | 2           |
| 20          | D3a        | 15    | 11-11  | 14      | 16      | 25     | 11     | 7      | 13     | 14     | 11     | 12     | 19     | 15     | 17     | 21     | 11        |         |          |         | 1           |
| 21          | E1b1b1c    | 13    | 17-18  | 13      | 18      | 25     | 9      | 11     | 14     | 14     | 10     | 12     | 20     | 15     | 17     | 21     | 11        |         |          | 1       |             |
| 22          | I2a        | 16    | 14-16  | 13      | 20      | 24     | 11     | 11     | 13     | 15     | 10     | 13     | 20     | 15     | 18     | 25     | 11        |         |          | 1       |             |
| 23          | J2a        | 14    | 15-16  | 13      | 16      | 23     | 10     | 11     | 12     | 15     | 9      | 11     | 21     | 15     | 18     | 23     | 11        |         |          |         | 3           |
| 24          | L          | 15    | 9-16   | 13      | 17      | 24     | 10     | 14     | 12     | 16     | 10     | 11     | 19     | 15     | 17     | 22     | 11        | 1       |          |         |             |
| 25          | NO*(xN1,O) | 14    | 12-12  | 13      | 17      | 23     | 11     | 14     | 13     | 14     | 10     | 10     | 19     | 15     | 17     | 24     | 11        |         |          |         | 1           |
| 26          | N1*        | 17    | 11-13  | 14      | 17      | 24     | 10     | 14     | 14     | 15     | 9.*    | 11     | 20     | 17     | 17     | 23     | 11        |         | 1        | 3       |             |
| 27          | N1b*       | 14    | 12-13  | 13      | 16      | 23     | 10     | 14     | 12     | 14     | 10     | 10     | 19     | 15     | 17     | 23     | 12        |         |          |         | 1           |
| 28          | N1b*       | 15    | 12-13  | 13      | 16      | 23     | 10     | 14     | 13     | 14     | 10     | 10     | 19     | 15     | 17     | 24     | 12        | 2       |          |         |             |
| 29          | N1b*       | 14    | 12-13  | 13      | 16      | 23     | 10     | 14     | 13     | 14     | 10     | 10     | 19     | 15     | 17     | 24     | 13        | 1       |          |         |             |
| 30          | N1b*       | 14    | 12-13  | 13      | 16      | 23     | 10     | 14     | 13     | 14     | 10     | 10     | 19     | 15     | 17     | 24     | 12        | 1       |          |         |             |
| 31          | N1b*       | 14    | 12-12  | 13      | 16      | 23     | 11     | 14     | 13     | 14     | 10     | 10     | 19     | 15     | 17     | 24     | 12        | 1       |          |         |             |
| 32          | N1b*       | 14    | 12-12  | 13      | 16      | 23     | 10     | 15     | 12     | 14     | 10     | 10     | 19     | 15     | 17     | 24     | 12        |         |          |         |             |
| 33          | N1b*       | 14    | 12-12  | 13      | 16      | 23     | 10     | 15     | 12     | 14     | 10     | 10     | 19     | 15     | 17     | 24     | 13        |         | 3        |         |             |
| 34          | N1b*       | 14    | 12-12  | 13      | 16      | 23     | 10     | 14     | 12     | 14     | 10     | 10     | 19     | 15     | 17     | 24     | 12        |         | 2        |         |             |
| 35          | N1b*       | 14    | 11-12  | 13      | 16      | 23     | 10     | 15     | 12     | 14     | 10     | 10     | 19     | 15     | 17     | 24     | 12        |         | 2        |         |             |
| 36          | N1c(xN1c1) | 14    | 11-12  | 13      | 15      | 24     | 11     | 15     | 13     | 14     | 10     | 11     | 20     | 16     | 18     | 21     | 13        |         |          |         | 1           |
| 37          | N1c1       | 14    | 11-11  | 13      | 16      | 23     | 11     | 14     | 14     | 14     | 10     | 10     | 19     | 14     | 17     | 22     | 12        |         |          |         | 1           |
| 38          | N1c1       | 15    | 12-13  | 14      | 16      | 23     | 11     | 14     | 14     | 14     | 10     | 11     | 20     | 15     | 18     | 23     | 11        |         |          |         | 1           |
| 39          | O3a3c*     | 15    | 13-18  | 12      | 17      | 23     | 10     | 13     | 12     | 15     | 10     | 12     | 19     | 15     | 17     | 19     | 12        |         |          |         | 1           |

| Haplotype # | Haplogroup | DYS19 | DYS385 | DYS389I | DYS389b | DYS390 | DYS391 | DYS392 | DYS393 | DYS437 | DYS438 | DYS439 | DYS448 | DYS456 | DYS458 | DYS635 | Y GATA H4 | Chelkan | Kumandin | Tubalar | Altai-kizhi |
|-------------|------------|-------|--------|---------|---------|--------|--------|--------|--------|--------|--------|--------|--------|--------|--------|--------|-----------|---------|----------|---------|-------------|
| 40          | O3a3c1*    | 14    | 12-17  | 12      | 15      | 23     | 10     | 15     | 12     | 15     | 11     | 13     | 20     | 15     | 17     | 20     | 12        |         |          | 1       | 1           |
| 41          | Q1a2       | 13    | 13-16  | 13      | 15      | 24     | 10     | 15     | 13     | 14     | 11     | 13     | 22     | 16     | 17     | 24     | 11        |         |          | 1       |             |
| 49          | Q1a3a1c*   | 13    | 15-19  | 14      | 17      | 24     | 10     | 14     | 13     | 14     | 11     | 12     | 19     | 17     | 16     | 22     | 11        | 1       |          |         | 1           |
| 50          | Q1a3a1c*   | 13    | 15-18  | 14      | 19      | 23     | 10     | 15     | 14     | 13     | 11     | 12     | 19     | 15     | 16     | 22     | 11        |         |          |         | 8           |
| 51          | Q1a3a1c*   | 13    | 14-14  | 13      | 18      | 23     | 10     | 14     | 13     | 13     | 11     | 12     | 19     | 15     | 16     | 22     | 11        |         |          |         | 4           |
| 52          | Q1a3a1c*   | 13    | 15-16  | 13      | 18      | 23     | 10     | 14     | 13     | 13     | 11     | 12     | 19     | 15     | 18     | 22     | 11        |         |          |         | 2           |
| 53          | Q1a3a1c*   | 13    | 15-16  | 13      | 19      | 23     | 10     | 14     | 13     | 13     | 11     | 11     | 18     | 15     | 18     | 22     | 11        |         |          |         | 2           |
| 54          | Q1a3a1c*   | 13    | 15-16  | 13      | 17      | 23     | 10     | 14     | 13     | 13     | 11     | 12     | 19     | 15     | 18     | 22     | 11        |         |          |         | 2           |
| 55          | Q1a3a1c*   | 13    | 15-16  | 13      | 17      | 23     | 9      | 14     | 13     | 13     | 11     | 12     | 19     | 15     | 17     | 22     | 11        |         |          |         | 1           |
| 56          | Q1a3a1c*   | 13    | 14-14  | 13      | 18      | 23     | 10     | 14     | 13     | 13     | 11     | 12     | 19     | 14     | 16     | 22     | 11        |         |          |         | 1           |
| 57          | Q1a3a1c*   | 13    | 15-16  | 14      | 18      | 23     | 10     | 14     | 13     | 13     | 11     | 12     | 19     | 15     | 18     | 22     | 11        |         |          |         | 1           |
| 58          | Q1a3a1c*   | 13    | 15-19  | 14      | 17      | 23     | 10     | 14     | 13     | 14     | 11     | 12     | 19     | 17     | 16     | 22     | 11        | 2       |          |         |             |
| 59          | Q1a3a1c*   | 10    | 15-19  | 14      | 17      | 24     | 10     | 14     | 13     | 14     | 11     | 13     | 19     | 17     | 16     | 22     | 11        | 1       |          |         |             |
| 60          | Q1a3a1c*   | 13    | 15-19  | 14      | 17      | 25     | 10     | 14     | 13     | 14     | 11     | 13     | 19     | 17     | 16     | 22     | 11        | 1       |          |         |             |
| 42          | Q1a3a*     | 13    | 15-19  | 14      | 17      | 24     | 10     | 14     | 13     | 14     | 11     | 13     | 19     | 18     | 16     | 22     | 10        | 1       |          |         |             |
| 43          | Q1a3a*     | 13    | 15-19  | 14      | 17      | 24     | 10     | 14     | 13     | 14     | 11     | 13     | 19     | 17     | 16     | 22     | 11        | 6       |          | 1       |             |
| 44          | Q1a3a*     | 13    | 15-16  | 14      | 17      | 24     | 10     | 14     | 13     | 14     | 11     | 13     | 19     | 16     | 16     | 22     | 11        | 1       |          | 1       |             |
| 45          | Q1a3a*     | 13    | 15-18  | 14      | 17      | 24     | 10     | 14     | 13     | 14     | 11     | 13     | 19     | 16     | 16     | 22     | 11        | 1       |          | 4       |             |
| 46          | Q1a3a*     | 13    | 15-18  | 14      | 17      | 24     | 10     | 14     | 13     | 14     | 11     | 13     | 19     | 17     | 16     | 22     | 11        | 1       |          |         |             |
| 47          | Q1a3a*     | 13    | 15-18  | 15      | 17      | 24     | 10     | 14     | 13     | 14     | 11     | 13     | 19     | 16     | 16     | 22     | 12        |         |          |         | 1           |
| 48          | Q1a3a*     | 13    | 15-17  | 14      | 17      | 24     | 10     | 14     | 13     | 14     | 11     | 12     | 19     | 16     | 16     | 22     | 11        |         |          |         | 2           |
| 61          | R1a1a1*    | 17    | 11-17  | 14      | 17      | 26     | 11     | 11     | 13     | 14     | 11     | 11     | 19     | 15     | 15     | 23     | 11        |         |          |         | 2           |
| 62          | R1a1a1*    | 16    | 11-14  | 14      | 18      | 25     | 11     | 11     | 13     | 14     | 11     | 10     | 21     | 16     | 15     | 23     | 10        |         |          |         | 5           |
| 63          | R1a1a1*    | 15    | 11-15  | 12      | 18      | 25     | 11     | 11     | 13     | 14     | 11     | 10     | 21     | 15     | 15     | 23     | 12        |         |          |         | 1           |
| 64          | R1a1a1*    | 16    | 11-17  | 14      | 17      | 26     | 11     | 11     | 13     | 14     | 11     | 11     | 19     | 15     | 15     | 23     | 11        |         |          |         | 4           |
| 65          | R1a1a1*    | 16    | 11-18  | 14      | 17      | 25     | 11     | 11     | 13     | 14     | 11     | 11     | 19     | 15     | 15     | 23     | 10        |         |          |         | 2           |
| 66          | R1a1a1*    | 16    | 11-17  | 13      | 17      | 26     | 11     | 11     | 13     | 15     | 11     | 11     | 19     | 15     | 15     | 23     | 11        |         |          |         | 1           |
| 67          | R1a1a1*    | 16    | 11-14  | 14      | 18      | 25     | 11     | 11     | 13     | 14     | 11     | 10     | 21     | 16     | 15     | 23     | 12        |         |          |         | 9           |
| 68          | R1a1a1*    | 16    | 11-14  | 15      | 18      | 25     | 11     | 11     | 13     | 14     | 11     | 10     | 21     | 17     | 15     | 23     | 12        |         |          |         | 2           |
| 69          | R1a1a1*    | 16    | 11-14  | 14      | 18      | 26     | 10     | 11     | 13     | 14     | 11     | 10     | 21     | 16     | 15     | 23     | 12        |         |          |         | 3           |
| 70          | R1a1a1*    | 16    | 11-14  | 14      | 18      | 25     | 11     | 11     | 13     | 14     | 12     | 10     | 21     | 16     | 15     | 23     | 12        |         |          |         | 1           |
| 71          | R1a1a1*    | 16    | 11-14  | 14      | 18      | 25     | 11     | 11     | 13     | 14     | 11     | 10     | 21     | 16     | 15     | 24     | 12        |         |          |         | 2           |
| 72          | R1a1a1*    | 16    | 11-14  | 14      | 17      | 25     | 11     | 11     | 13     | 14     | 11     | 10     | 21     | 15     | 15     | 23     | 12        |         |          |         | 1           |
| 73          | R1a1a1*    | 16    | 11-14  | 14      | 17      | 25     | 11     | 11     | 13     | 14     | 11     | 10     | 21     | 17     | 15     | 23     | 12        |         |          |         | 1           |
| 74          | R1a1a1*    | 16    | 11-14  | 14      | 18      | 25     | 12     | 11     | 13     | 14     | 11     | 10     | 21     | 17     | 15     | 23     | 12        |         |          |         | 2           |
| 75          | R1a1a1*    | 16    | 11-14  | 14      | 18      | 25     | 11     | 11     | 13     | 14     | 11     | 10     | 21     | 17     | 15     | 23     | 12        |         |          |         | 5           |
| 76          | R1a1a1*    | 16    | 11-14  | 14      | 18      | 25     | 11     | 11     | 13     | 14     | 11     | 10     | 21     | 15     | 15     | 23     | 12        |         |          |         | 1           |
| 77          | R1a1a1*    | 16    | 11-17  | 14      | 18      | 26     | 10     | 11     | 13     | 14     | 11     | 11     | 19     | 15     | 15     | 23     | 11        |         |          |         | 3           |
| 78          | R1a1a1*    | 16    | 11-14  | 14      | 18      | 25     | 11     | 11     | 13     | 14     | 11     | 10     | 21     | 17     | 15     | 23     | 11        |         |          |         | 1           |
| 79          | R1a1a1*    | 16    | 11-17  | 14      | 18      | 26     | 11     | 11     | 13     | 14     | 11     | 12     | 19     | 15     | 15     | 23     | 11        |         |          |         | 1           |
| 80          | R1a1a1*    | 16    | 11-17  | 14      | 18      | 26     | 11     | 11     | 13     | 14     | 11     | 11     | 19     | 15     | 15     | 23     | 11        |         |          |         | 1           |
| 81          | R1a1a1*    | 16    | 11-17  | 14      | 18      | 26     | 10     | 11     | 13     | 14     | 11     | 12     | 19     | 15     | 15     | 23     | 11        |         |          |         | 1           |
| 82          | R1a1a1*    | 16    | 11-14  | 14      | 18      | 25     | 11     | 11     | 13     | 14     | 11     | 10     | 21     | 16     | 15     | 23     | 11        |         |          |         | 1           |

| Haplotype # | Haplogroup | DYS19 | DYS385 | DYS389I | DYS389b | DYS390 | DYS391 | DYS392 | DYS393 | DYS437 | DYS438 | DYS439 | DYS448 | DYS456 | DYS458 | DYS635 | Y GATA H4 | Chelkan | Kumandin | Tubalar | Altai-kizhi |
|-------------|------------|-------|--------|---------|---------|--------|--------|--------|--------|--------|--------|--------|--------|--------|--------|--------|-----------|---------|----------|---------|-------------|
| 83          | R1a1a1*    | 17    | 11-13  | 12      | 18      | 25     | 10     | 11     | 13     | 14     | 11     | 10     | 20     | 16     | 15     | 23     | 13        |         |          |         | 1           |
| 84          | R1a1a1*    | 16    | 11-17  | 14      | 17      | 26     | 11     | 11     | 13     | 14     | 11     | 11     | 19     | 15     | 16     | 23     | 11        |         |          |         | 1           |
| 85          | R1a1a1*    | 16    | 11-18  | 14      | 18      | 26     | 10     | 11     | 13     | 14     | 11     | 11     | 19     | 15     | 15     | 23     | 11        |         |          |         | 1           |
| 86          | R1a1a1*    | 16    | 11-17  | 14      | 17      | 26     | 11     | 11     | 13     | 14     | 11     | 11     | 20     | 15     | 15     | 23     | 11        |         |          |         | 1           |
| 87          | R1a1a1*    | 16    | 11-14  | 14      | 17      | 25     | 11     | 11     | 13     | 14     | 11     | 10     | 21     | 16     | 15     | 23     | 12        |         |          |         | 1           |
| 88          | R1a1a1*    | 16    | 11-14  | 14      | 18      | 25     | 10     | 11     | 13     | 14     | 11     | 10     | 21     | 16     | 15     | 23     | 12        |         |          |         | 1           |
| 89          | R1a1a1*    | 16    | 12-14  | 14      | 17      | 24     | 10     | 11     | 13     | 14     | 11     | 10     | 20     | 17     | 14     | 23     | 12        |         |          |         | 1           |
| 90          | R1a1a1*    | 16    | 14-15  | 14      | 19      | 25     | 11     | 11     | 13     | 14     | 11     | 10     | 21     | 17     | 15     | 23     | 12        |         |          |         | 1           |
| 91          | R1a1a1*    | 15    | 11-15  | 13      | 19      | 25     | 10     | 11     | 13     | 14     | 11     | 10     | 20     | 15     | 16     | 23     | 13        |         |          |         | 1           |
| 92          | R1a1a1*    | 16    | 12-14  | 14      | 18      | 24     | 9      | 11     | 13     | 14     | 11     | 10     | 20     | 18     | 14     | 23     | 12        | 3       |          |         |             |
| 93          | R1a1a1*    | 16    | 11-14  | 14      | 17      | 25     | 11     | 11     | 13     | 14     | 11     | 11     | 20     | 16     | 17     | 23     | 13        | 1       |          |         |             |
| 94          | R1a1a1*    | 15    | 11-14  | 13      | 17      | 25     | 11     | 11     | 13     | 14     | 11     | 10     | 20     | 16     | 15     | 23     | 11        |         | 1        |         |             |
| 95          | R1a1a1*    | 15    | 11-15  | 13      | 17      | 24     | 10     | 11     | 13     | 14     | 11     | 10     | 20     | 16     | 15     | 23     | 12        |         | 1        |         |             |
| 96          | R1a1a1*    | 16    | 11-14  | 14      | 17      | 24     | 11     | 11     | 13     | 14     | 11     | 11     | 20     | 16     | 16     | 23     | 14        |         |          | 2       |             |
| 97          | R1a1a1*    | 16    | 12-14  | 14      | 18      | 24     | 10     | 11     | 13     | 14     | 11     | 10     | 20     | 17     | 14     | 23     | 12        |         |          | 1       |             |
| 98          | R1a1a1*    | 16    | 11-14  | 14      | 17      | 24     | 11     | 11     | 13     | 14     | 11     | 11     | 20     | 16     | 16     | 23     | 13        |         |          | 1       |             |
| 99          | R1a1a1*    | 16    | 12-14  | 14      | 19      | 24     | 9      | 11     | 13     | 14     | 11     | 10     | 20     | 17     | 14     | 23     | 12        |         |          | 2       |             |
| 100         | R1a1a1*    | 16    | 11-14  | 13      | 17      | 25     | 10     | 11     | 13     | 14     | 11     | 11     | 20     | 17     | 16     | 23     | 11        |         |          | 1       |             |
| 101         | R1a1a1*    | 16    | 11-14  | 13      | 17      | 25     | 11     | 11     | 14     | 14     | 11     | 12     | 21     | 16     | 17     | 23     | 14        |         |          | 1       |             |
| 102         | R1a1a1*    | 16    | 12-14  | 14      | 18      | 24     | 10     | 11     | 13     | 14     | 11     | 10     | 20     | 16     | 14     | 23     | 12        |         |          | 1       |             |
| 103         | R1a1a1*    | 16    | 11-14  | 14      | 17      | 25     | 11     | 11     | 13     | 14     | 11     | 11     | 20     | 16     | 16     | 23     | 14        |         |          | 1       |             |
| 104         | R1b1b1     | 14    | 13-13  | 13      | 16      | 19     | 10     | 13     | 13     | 15     | 10     | 13     | 19     | 15     | 18     | 24     | 11        |         | 2        |         |             |
| 105         | R1b1b1     | 14    | 13-13  | 13      | 16      | 19     | 10     | 13     | 13     | 15     | 10     | 13     | 19     | 15     | 17     | 24     | 11        |         | 3        |         |             |
| 106         | R1b1b1     | 14    | 13-16  | 13      | 17      | 22     | 11     | 13     | 13     | 15     | 10     | 13     | 20     | 15     | 16     | 23     | 11        |         | 1        |         |             |

**Table S5.  $F_{ST}$  values estimated from mtDNA data for Altaian ethnic groups**

|             | Chelkan | Kumandin | Tubalar | Altai-kizhi |
|-------------|---------|----------|---------|-------------|
| Chelkan     | *       | 0.000    | 0.000   | 0.000       |
| Kumandin    | 0.046   | *        | 0.097   | 0.007       |
| Tubalar     | 0.041   | 0.011    | *       | 0.028       |
| Altai-kizhi | 0.037   | 0.017    | 0.008   | *           |

$F_{ST}$  values are displayed in the lower matrix. P-values are located in the upper matrix

**Table S6.  $R_{ST}$  values estimated from NRY data for Altaian ethnic groups**

|             | Chelkan | Kumandin | Tubalar | Altai-kizhi |
|-------------|---------|----------|---------|-------------|
| Chelkan     | *       | 0.000    | 0.146   | 0.000       |
| Kumandin    | 0.316   | *        | 0.000   | 0.000       |
| Tubalar     | 0.024   | 0.331    | *       | 0.000       |
| Altai-kizhi | 0.237   | 0.414    | 0.124   | *           |

$R_{ST}$  values are displayed in the lower matrix. P-values are located in the upper matrix.
